# Supplementary material for: Reversible four-color electrochromism triggered by the electrochemical multi-step redox of Cr-based metallo-supramolecular polymers
Source: Royal Society of Chemistry journal article supplement (doi:10.1039/d0ra00676a), 2020-01-01
Supplement: d0ra00676a1.pdf [file d0ra00676a1.pdf]

## **Reversible four-color electrochromism triggered by the electrochemical multi-step redox of Cr-based metallo-supramolecular polymers**

Takefumi Yoshida, Yoshikazu Ninomiya and Masayoshi Higuchi\*

*Electronic Functional Macromolecules Group, National Institute for Materials Science (NIMS),  
Tsukuba 305-0044, Japan.*

1. EXAFS oscillation and Fourier transform of EXAFS for polyCr

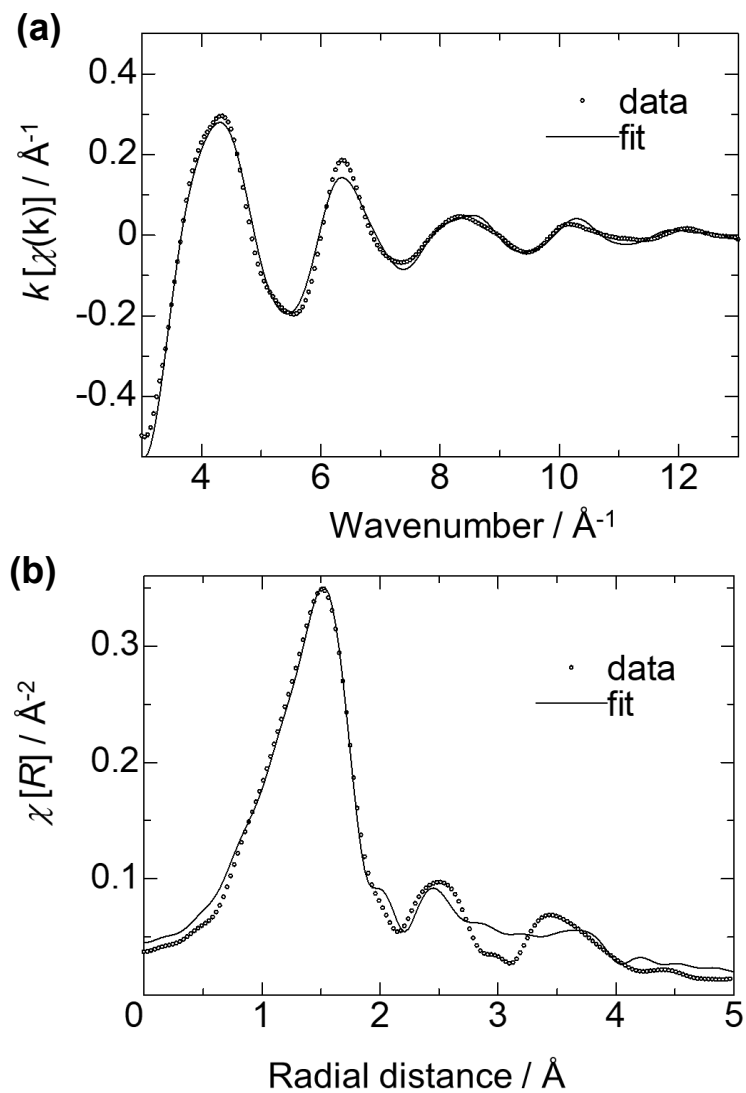

Fig. S1. (a) EXAFS oscillation and (b) Fourier transform of EXAFS for polyCr.

## 2. XPS spectra of polyCr

The peaks of C 1s, N 1s, O 1s, Cl 2s, Cr 2p were observed at  $\sim 285$ ,  $\sim 400$ ,  $\sim 530$ ,  $\sim 270$ ,  $\sim 580$  eV. These results confirmed the presence of each atoms.

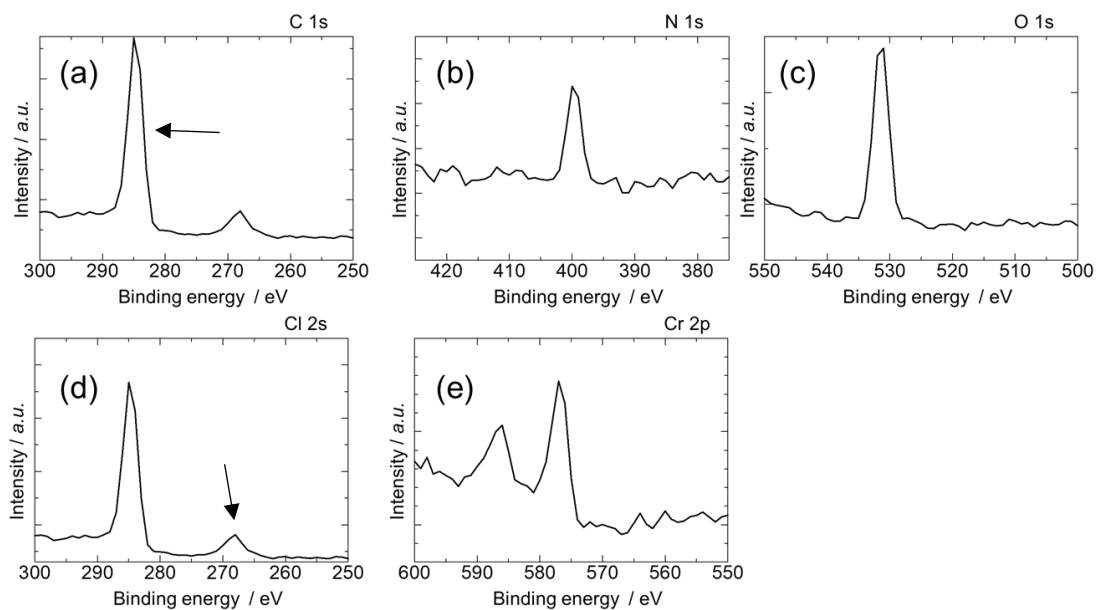

Fig. S2. XPS of polyCr.

## 3. Emission spectrum of polyCr

At room temperature (RT), upon excitation at 380 nm assigned to ILCT of polyCr, the characteristic luminescence of Cr(III) ions was observed at 820 nm (Fig. S3).

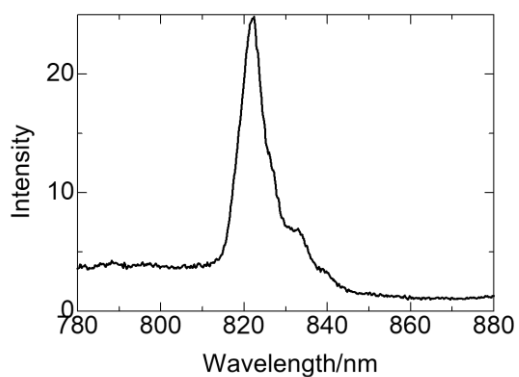

Fig. S3. An emission spectrum of polyCr.

#### 4. Cyclic voltammetry

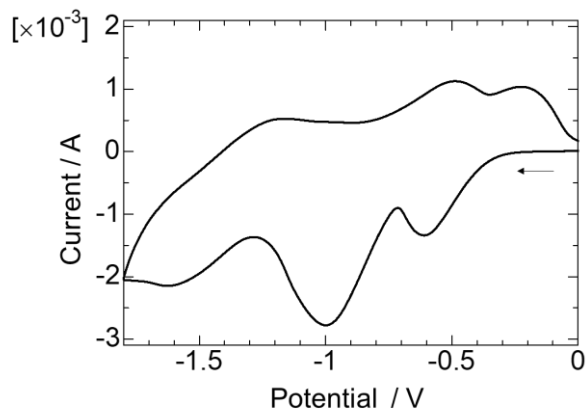

**Fig. S4.** Cyclic voltammogram (CV) of a film of **polyCr** on an ITO glass with a 0.1M MeCN solution of  $\text{LiClO}_4$  as electrolyte at a scan rate of 0.1 V/s.

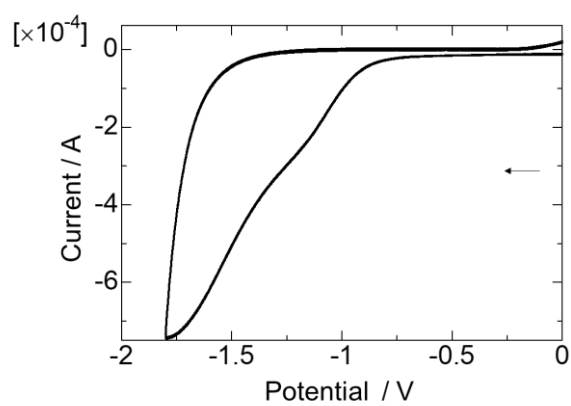

**Fig. S5** CV of a bare ITO glass with 0.1M MeCN solution of  $\text{LiClO}_4$  as electrolyte at a scan rate of 0.1 V/s.

## 5. HR-MS and IR spectra

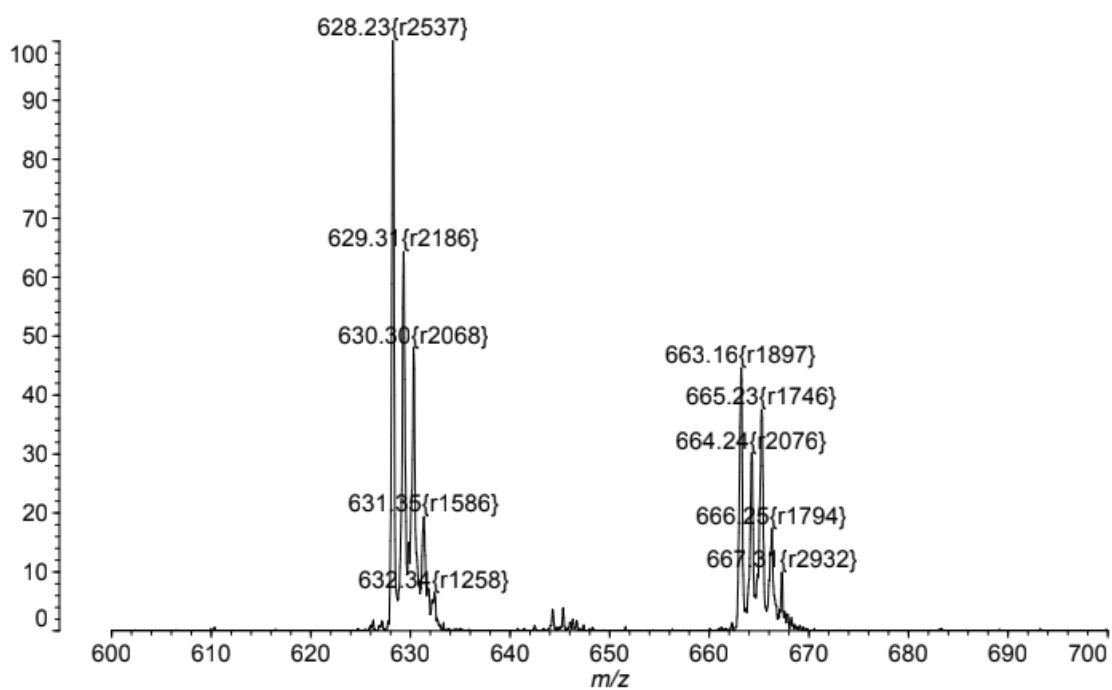

Fig. S6. HR-MS spectrum of polyCr.

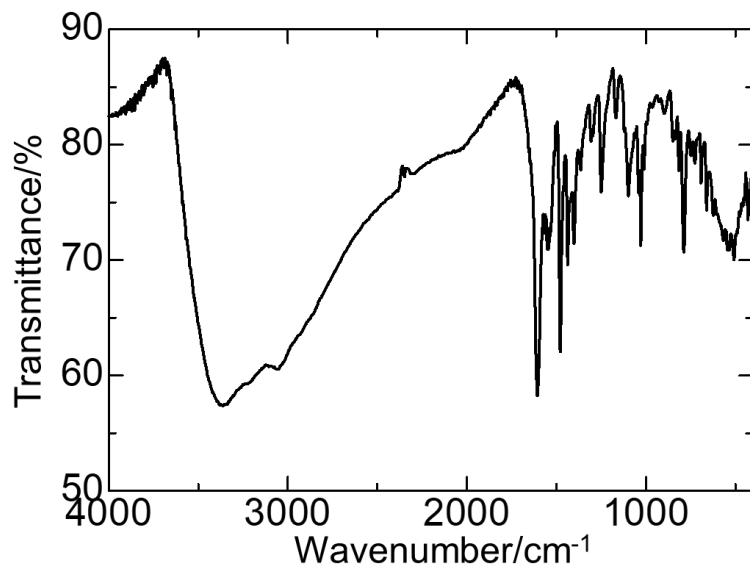

Fig. S7. IR spectrum of polyCr.

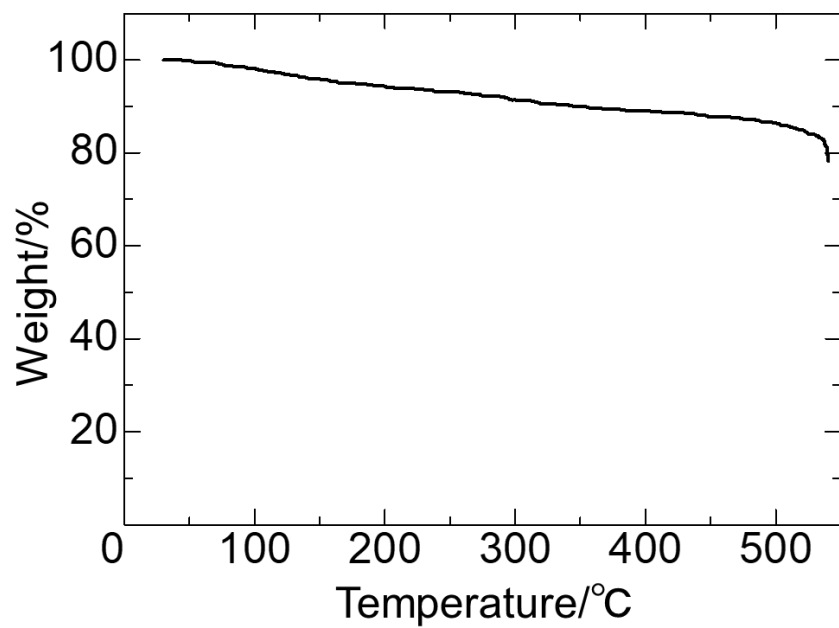

**Fig. S8.** A TGA curve of **polyCr**.
